# Supplementary material
Source: PubMed Central journal article supplement (PMC4435497)
Supplement: mt201491x1.pdf [file mt201491x1.pdf]

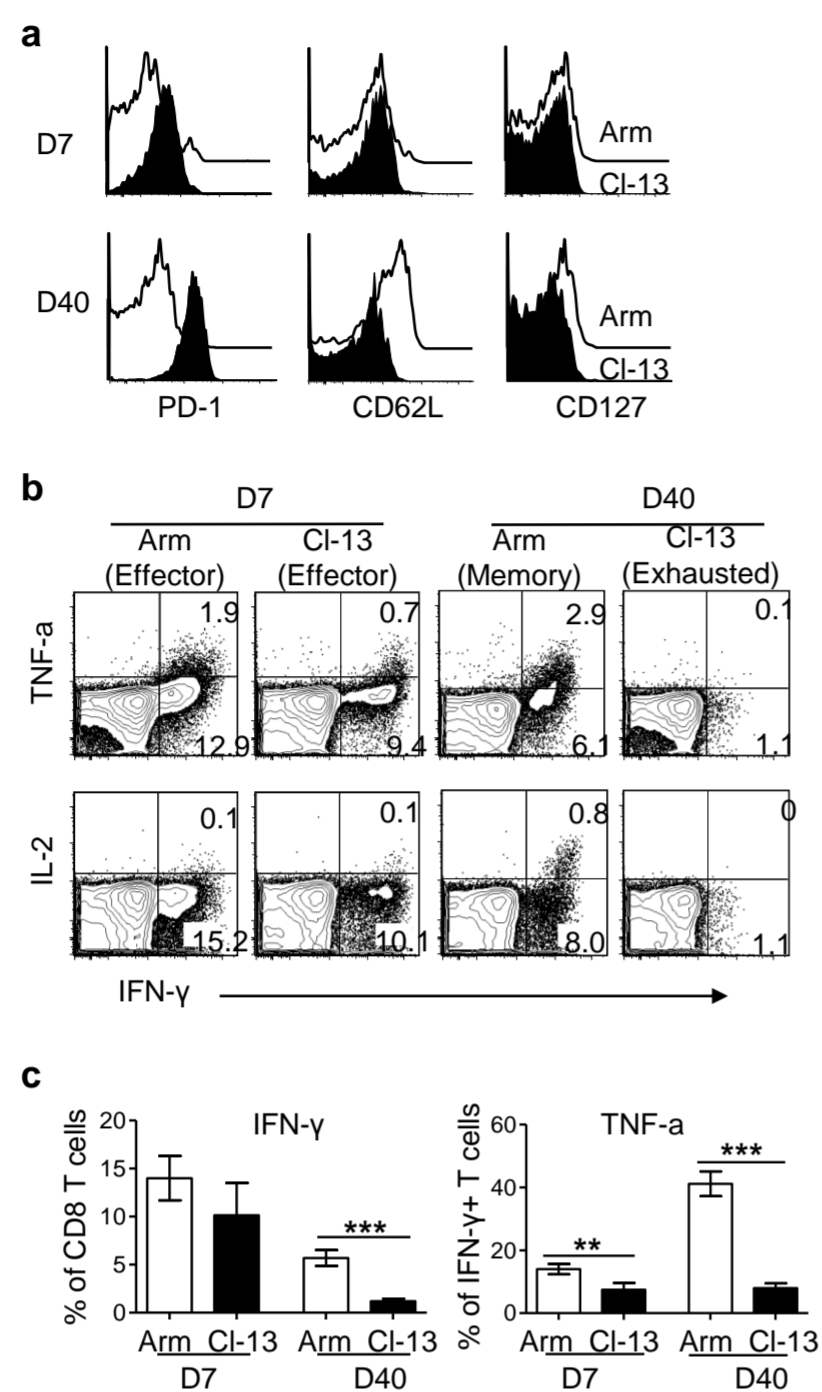

**Figure S1. Phenotypes of exhausted CD8<sup>+</sup> T cells during chronic LCMV infection.**

B6 mice were infected with LCMV Arm or CI-13 to establish acute or chronic infection. **(a)** The expression of PD-1, CD62L and CD127 were assessed on D<sup>b</sup>/GP33<sup>+</sup> CD8<sup>+</sup> T cells at day 7 and day 40 after Arm (unfilled) or CI-13 (black) infection. **(b)** Cytokines (IFN- $\gamma$ , TNF- $\alpha$  and IL-2) production was assessed by ICS after ex vivo stimulation with GP33-41 peptide on day 7 and day 40 after LCMV Arm or CI-13 infection. **(c)** The percentage of CD8<sup>+</sup> T cells producing IFN- $\gamma$  and percentage of IFN- $\gamma$ <sup>+</sup>CD8<sup>+</sup> T cells co-producing TNF- $\alpha$  at day 7 and 40 after Arm (unfilled) or CI-13 (black) infection are shown in the bar graph. The data shown are representative of three independent experiments with three to five mice per group.
