# Supplementary material
Source: PubMed Central journal article supplement (PMC4435497)
Supplement: mt201491x2.pdf [file mt201491x2.pdf]

Zhang et al. Fig S2

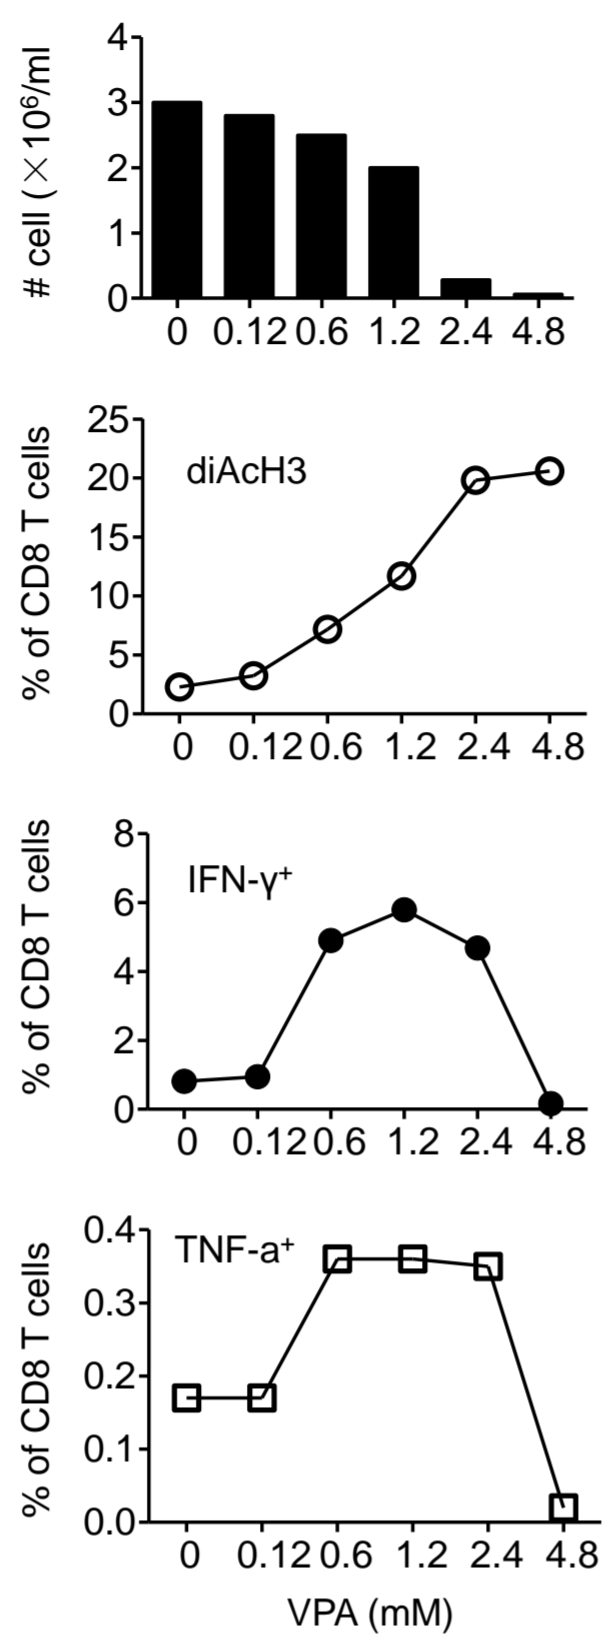

**Figure S2. Dose-dependent effect of in vitro VPA treatment on exhausted CD8<sup>+</sup> T cells.**

Splenocytes from CI-13 infected mice (day 40 p.i.) were cultured in vitro with anti-CD3 and anti-CD28 mAbs in the absence or presence of graded doses (0.12-4.8mM) of VPA for 48 hours, then washed and rested in medium overnight. Live cell numbers were determined (bar graph), and the diAcH3 level (circle) was determined as the percentages of CD8<sup>+</sup> T cells that were diAcH3<sup>hi</sup>. Their ability to produce IFN- $\gamma$  (filled circle) and TNF- $\alpha$  (square) were measured after stimulation with the GP33-41 peptide.
