# Supplementary material
Source: PubMed Central journal article supplement (PMC4435497)
Supplement: mt201491x3.pdf [file mt201491x3.pdf]

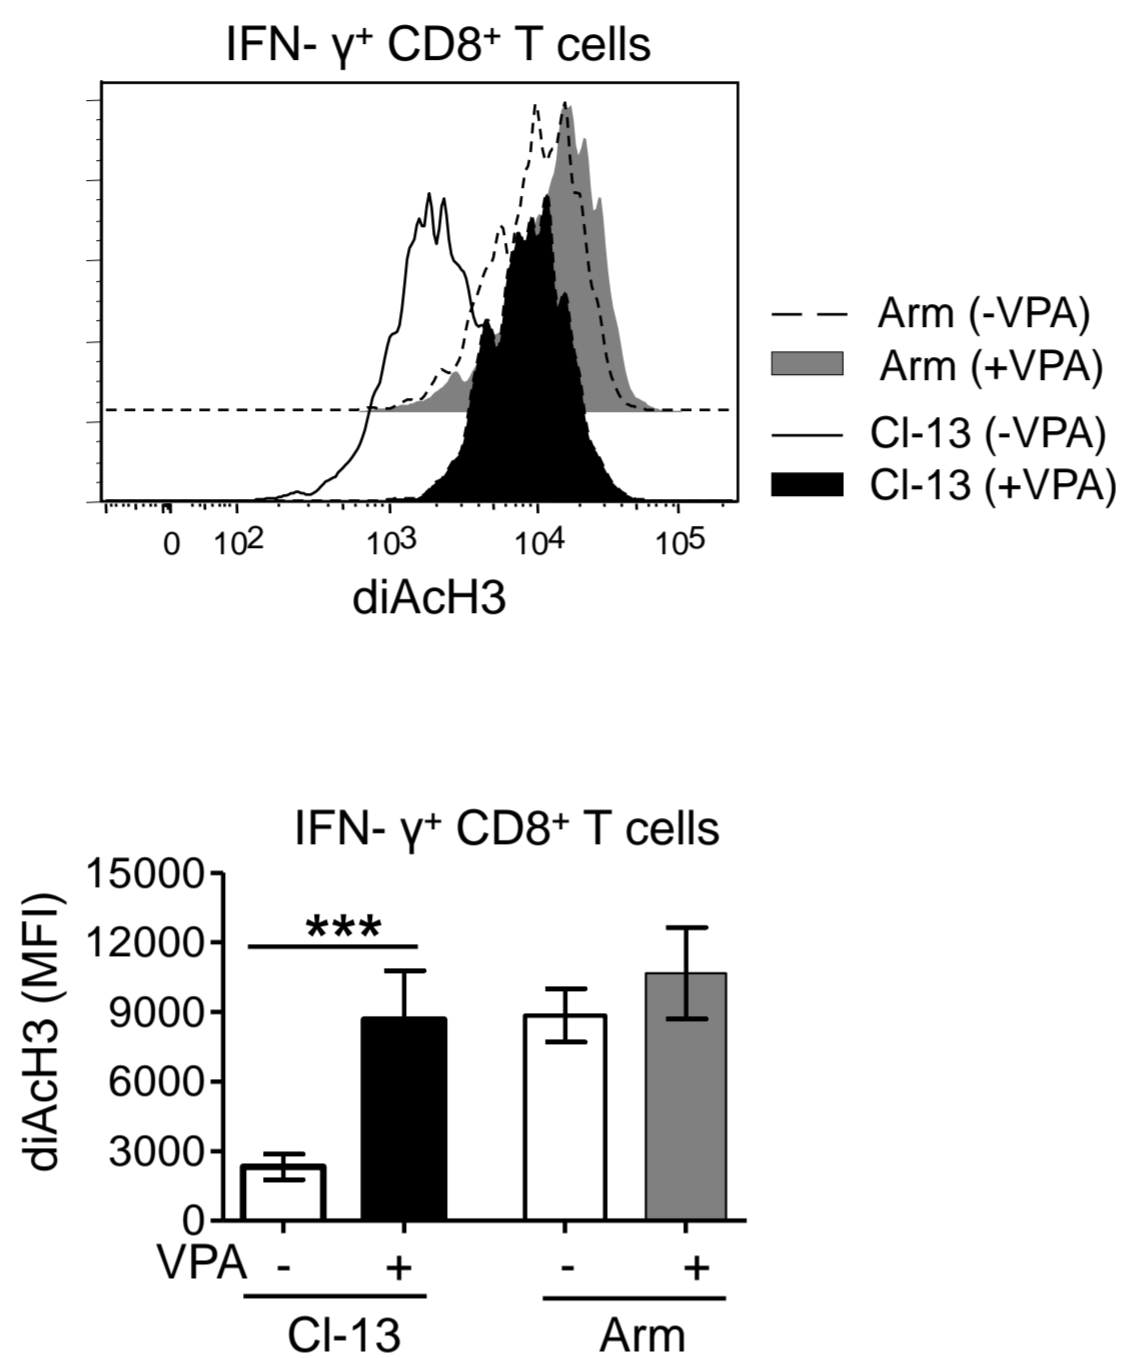

**Figure S3. VPA treatment increased the diACh3 level of exhausted T cells to levels comparable to that in functional memory T cells.**

Splenocytes from CI-13 or Arm infected mice (day 40 p.i.) were cultured in vitro with anti-CD3 and anti-CD28 mAbs in the absence or presence of VPA (1.2mM) for 48 hours, then washed and rested in medium overnight. The diACh3 level in IFN- $\gamma$ <sup>+</sup> CD8<sup>+</sup> T cells was measured by intracellular staining after stimulation with GP33-41 for 5 hours. The data shown are representative of more than 3 separate experiments (\* $P$  < 0.05, \*\* $P$  < 0.01, \*\*\* $P$  < 0.001).
