# Supplementary material
Source: PubMed Central journal article supplement (PMC4435497)
Supplement: mt201491x4.pdf [file mt201491x4.pdf]

**Zhang et al. Table S1. PCR Primers used for experiments**

| <b>Real-time RT-PCR</b>        |                           |
|--------------------------------|---------------------------|
| IFN- $\gamma$ Forward          | 5'-ACAATGAACGCTACACACTGA  |
| IFN- $\gamma$ Reverse          | 5'-TGGCAGTAACAGCCAGAAACA  |
| TNF- $\alpha$ Forward          | 5'-GGGACAGTGACCTGGACTGT   |
| TNF- $\alpha$ Reverse          | 5'-CTCCCTTTGCAGAATCTCAGG  |
| $\beta$ -actin Forward         | 5'-GACGGCCAGGTCATCACTATTG |
| $\beta$ -actin Reverse         | 5'-AGGAAGGCTGGAAAAGAGCC   |
| <b>ChIP</b>                    |                           |
| IL-2 promoter2 Forward         | 5'-GCCACCTAAGTGTGGGCTAA   |
| IL-2 promoter2 Reverse         | 5'-ATATGGGGGTGTCACGATGT   |
| IL-2 Promoter3 Forward         | 5'-CTCAGGGCTTGAAAGGACAG   |
| IL-2 Promoter3 Reverse         | 5'-TGCCTCAGGACATTCTACA    |
| IFN- $\gamma$ promoter Forward | 5'-GCTCTGTGGATGAGAAAT     |
| IFN- $\gamma$ promoter Reverse | 5'-AAGATGGTGACAGATAGG     |
| IFN- $\gamma$ enhancer Forward | 5'-CCTTCAGACGTCTTGAAAGTGA |
| IFN- $\gamma$ enhancer Reverse | 5'-TCCTCAGGGTAAACAACCTTCG |
